# Supplementary material for: ToRQuEMaDA: tool for retrieving queried Eubacteria, metadata and dereplicating assemblies
Source: PubMed Central journal article supplement (PMC8106394; doi:10.7717/peerj.11348), 2021-05-05
Supplement: peerj-09-11348-s004.pdf [file peerj-09-11348-s004.pdf]

Tree scale: 0.1

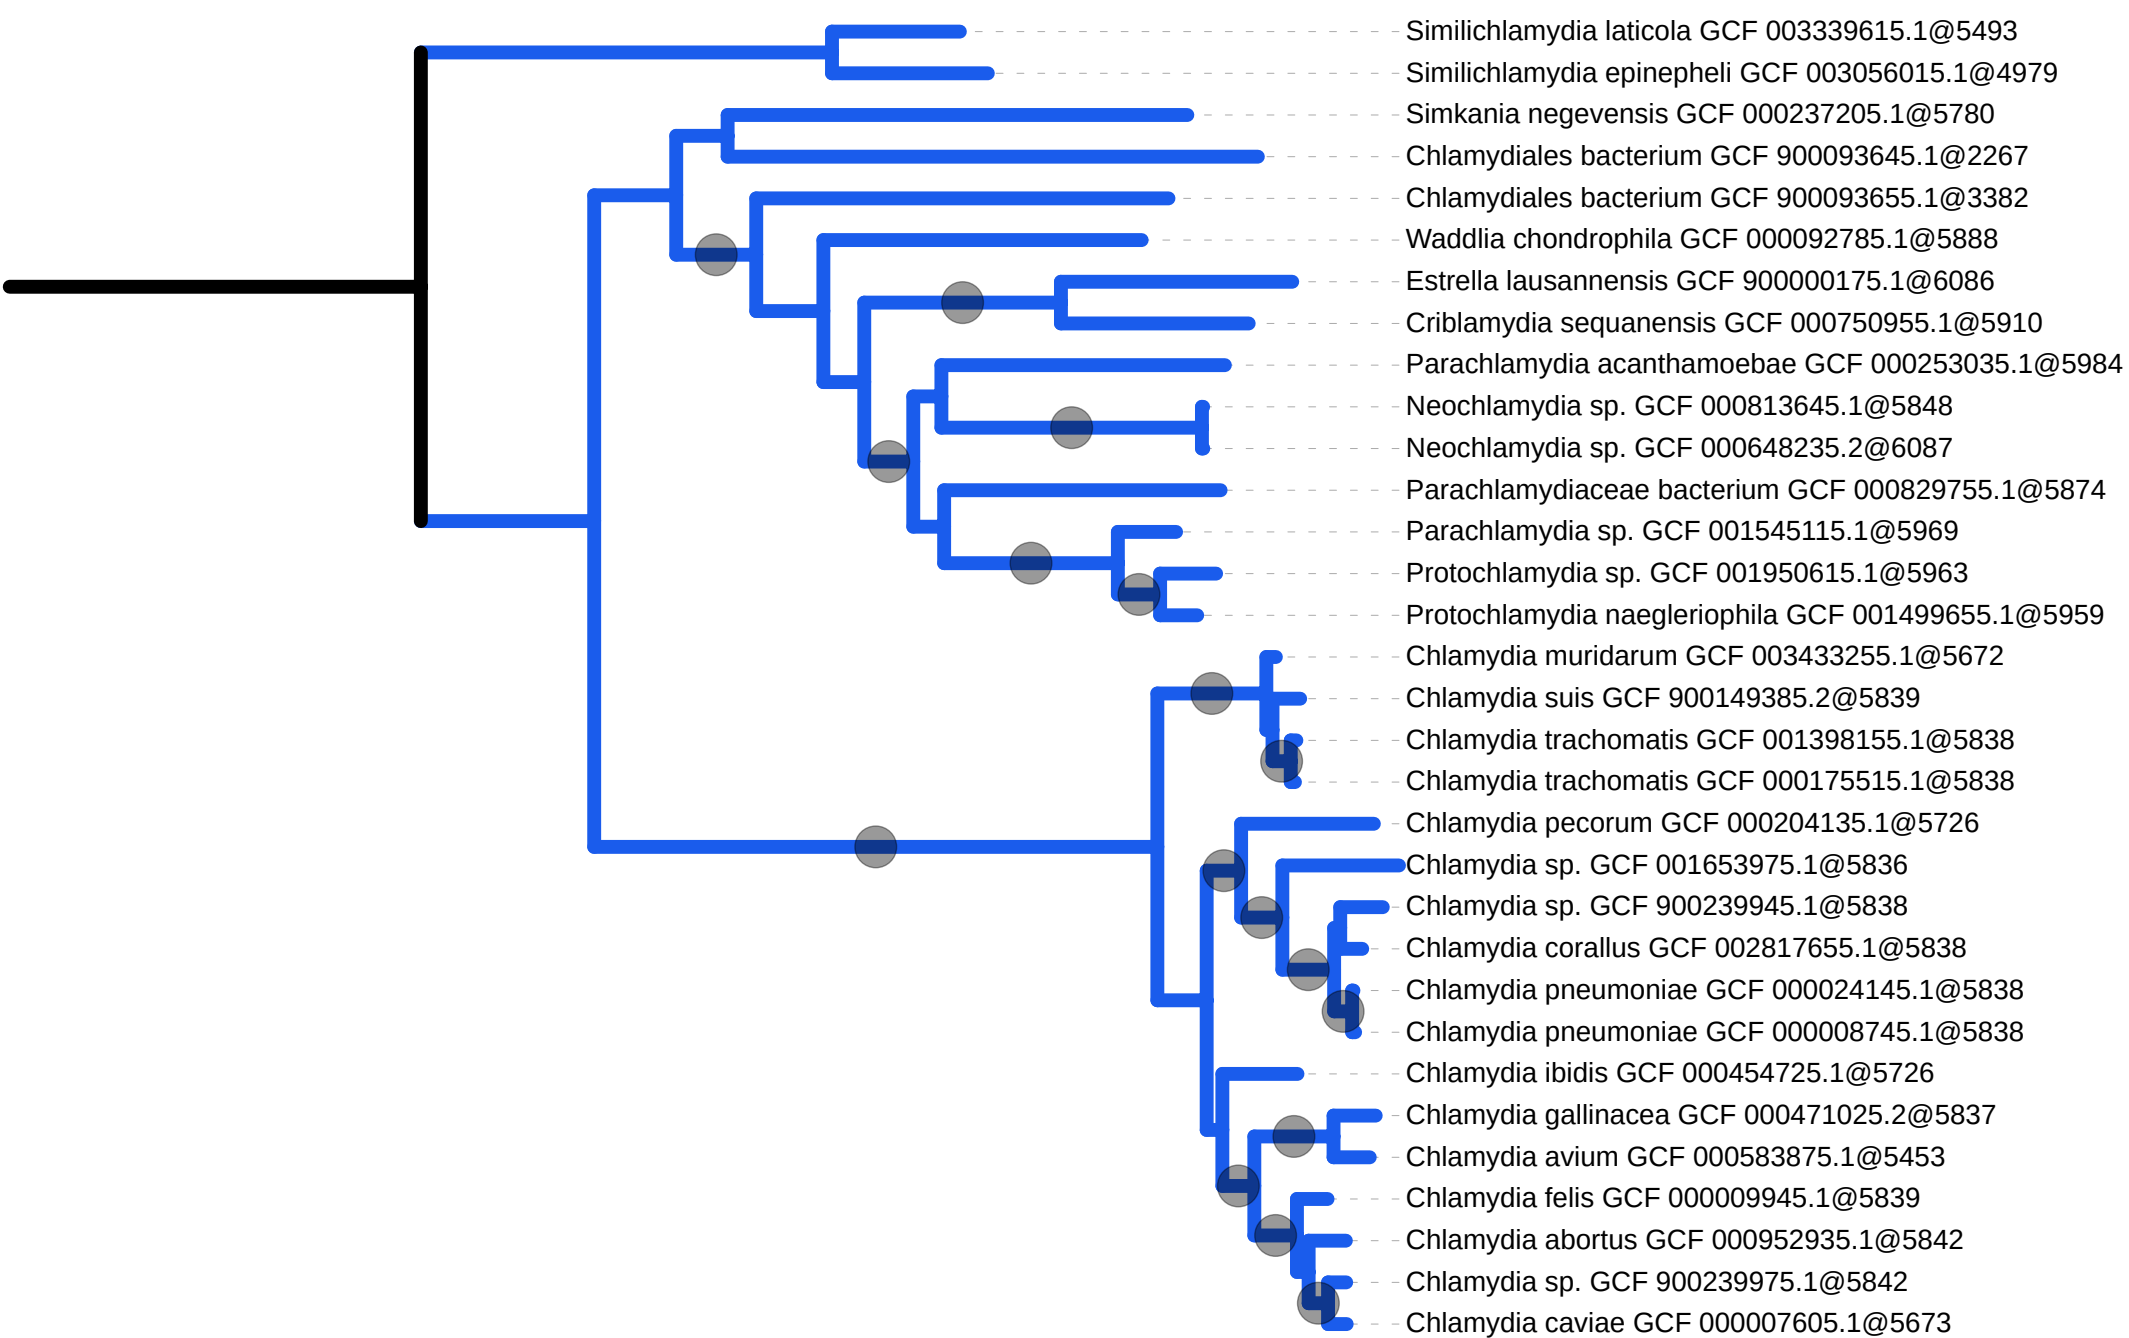

**Candidatus Parilichlamydiaceae**  
**Simkaniaceae**

**Waddliaceae**  
**Criblamydiaceae**

**Parachlamydiaceae**

**Chlamydiaceae**
