# Supplementary material for: ToRQuEMaDA: tool for retrieving queried Eubacteria, metadata and dereplicating assemblies
Source: PubMed Central journal article supplement (PMC8106394; doi:10.7717/peerj.11348), 2021-05-05
Supplement: peerj-09-11348-s006.pdf [file peerj-09-11348-s006.pdf]

Tree scale: 0.01

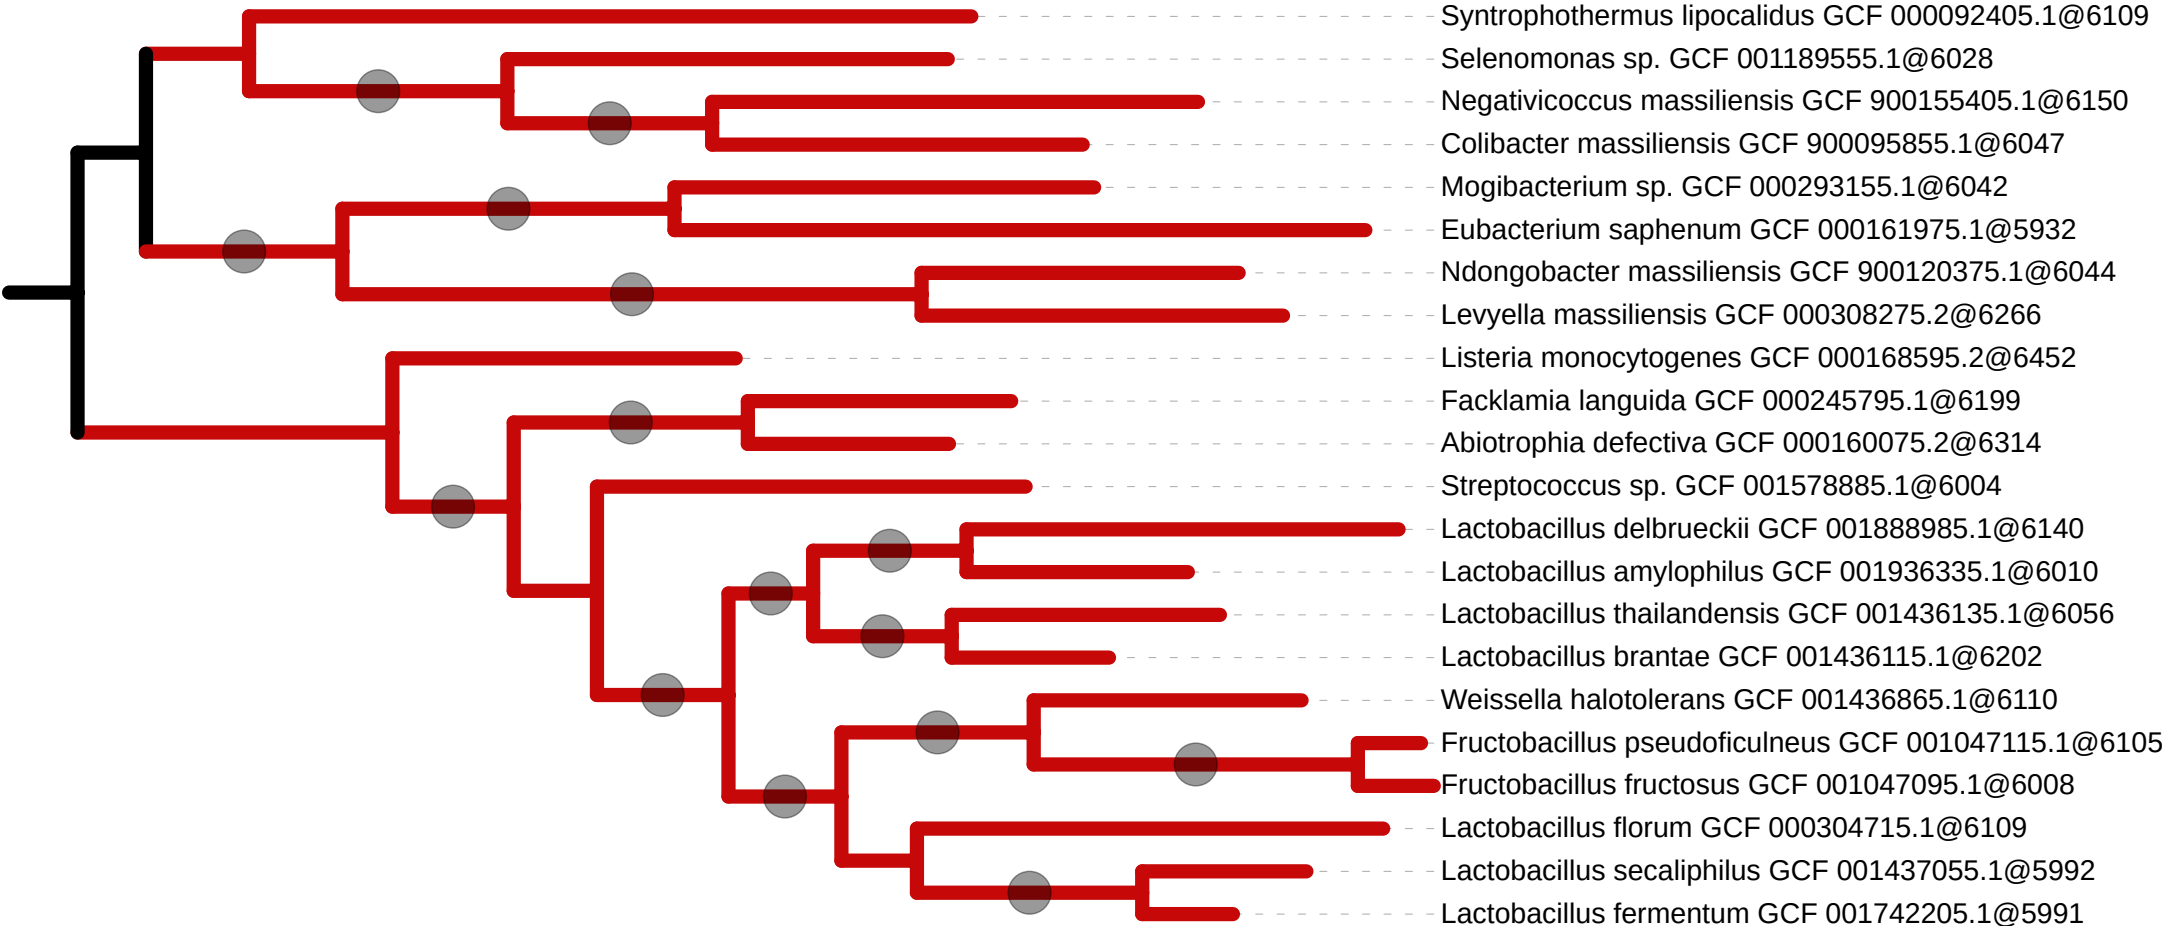

**Negativicutes**

**Clostridia**

**Bacilli**

- Syntrophothermus lipocalidus GCF 000092405.1@6109
- Selenomonas sp. GCF 001189555.1@6028
- Negativicoccus massiliensis GCF 900155405.1@6150
- Colibacter massiliensis GCF 900095855.1@6047
- Mogibacterium sp. GCF 000293155.1@6042
- Eubacterium saphenum GCF 000161975.1@5932
- Ndongobacter massiliensis GCF 900120375.1@6044
- Levyyella massiliensis GCF 000308275.2@6266
- Listeria monocytogenes GCF 000168595.2@6452
- Facklamia languida GCF 000245795.1@6199
- Abiotrophia defectiva GCF 000160075.2@6314
- Streptococcus sp. GCF 001578885.1@6004
- Lactobacillus delbrueckii GCF 001888985.1@6140
- Lactobacillus amylophilus GCF 001936335.1@6010
- Lactobacillus thailandensis GCF 001436135.1@6056
- Lactobacillus brantae GCF 001436115.1@6202
- Weissella halotolerans GCF 001436865.1@6110
- Fructobacillus pseudoficulneus GCF 001047115.1@6105
- Fructobacillus fructosus GCF 001047095.1@6008
- Lactobacillus florum GCF 000304715.1@6109
- Lactobacillus secaliphilus GCF 001437055.1@5992
- Lactobacillus fermentum GCF 001742205.1@5991
