# Supplementary material for: ToRQuEMaDA: tool for retrieving queried Eubacteria, metadata and dereplicating assemblies
Source: PubMed Central journal article supplement (PMC8106394; doi:10.7717/peerj.11348), 2021-05-05
Supplement: peerj-09-11348-s008.pdf [file peerj-09-11348-s008.pdf]

Tree scale: 0.1

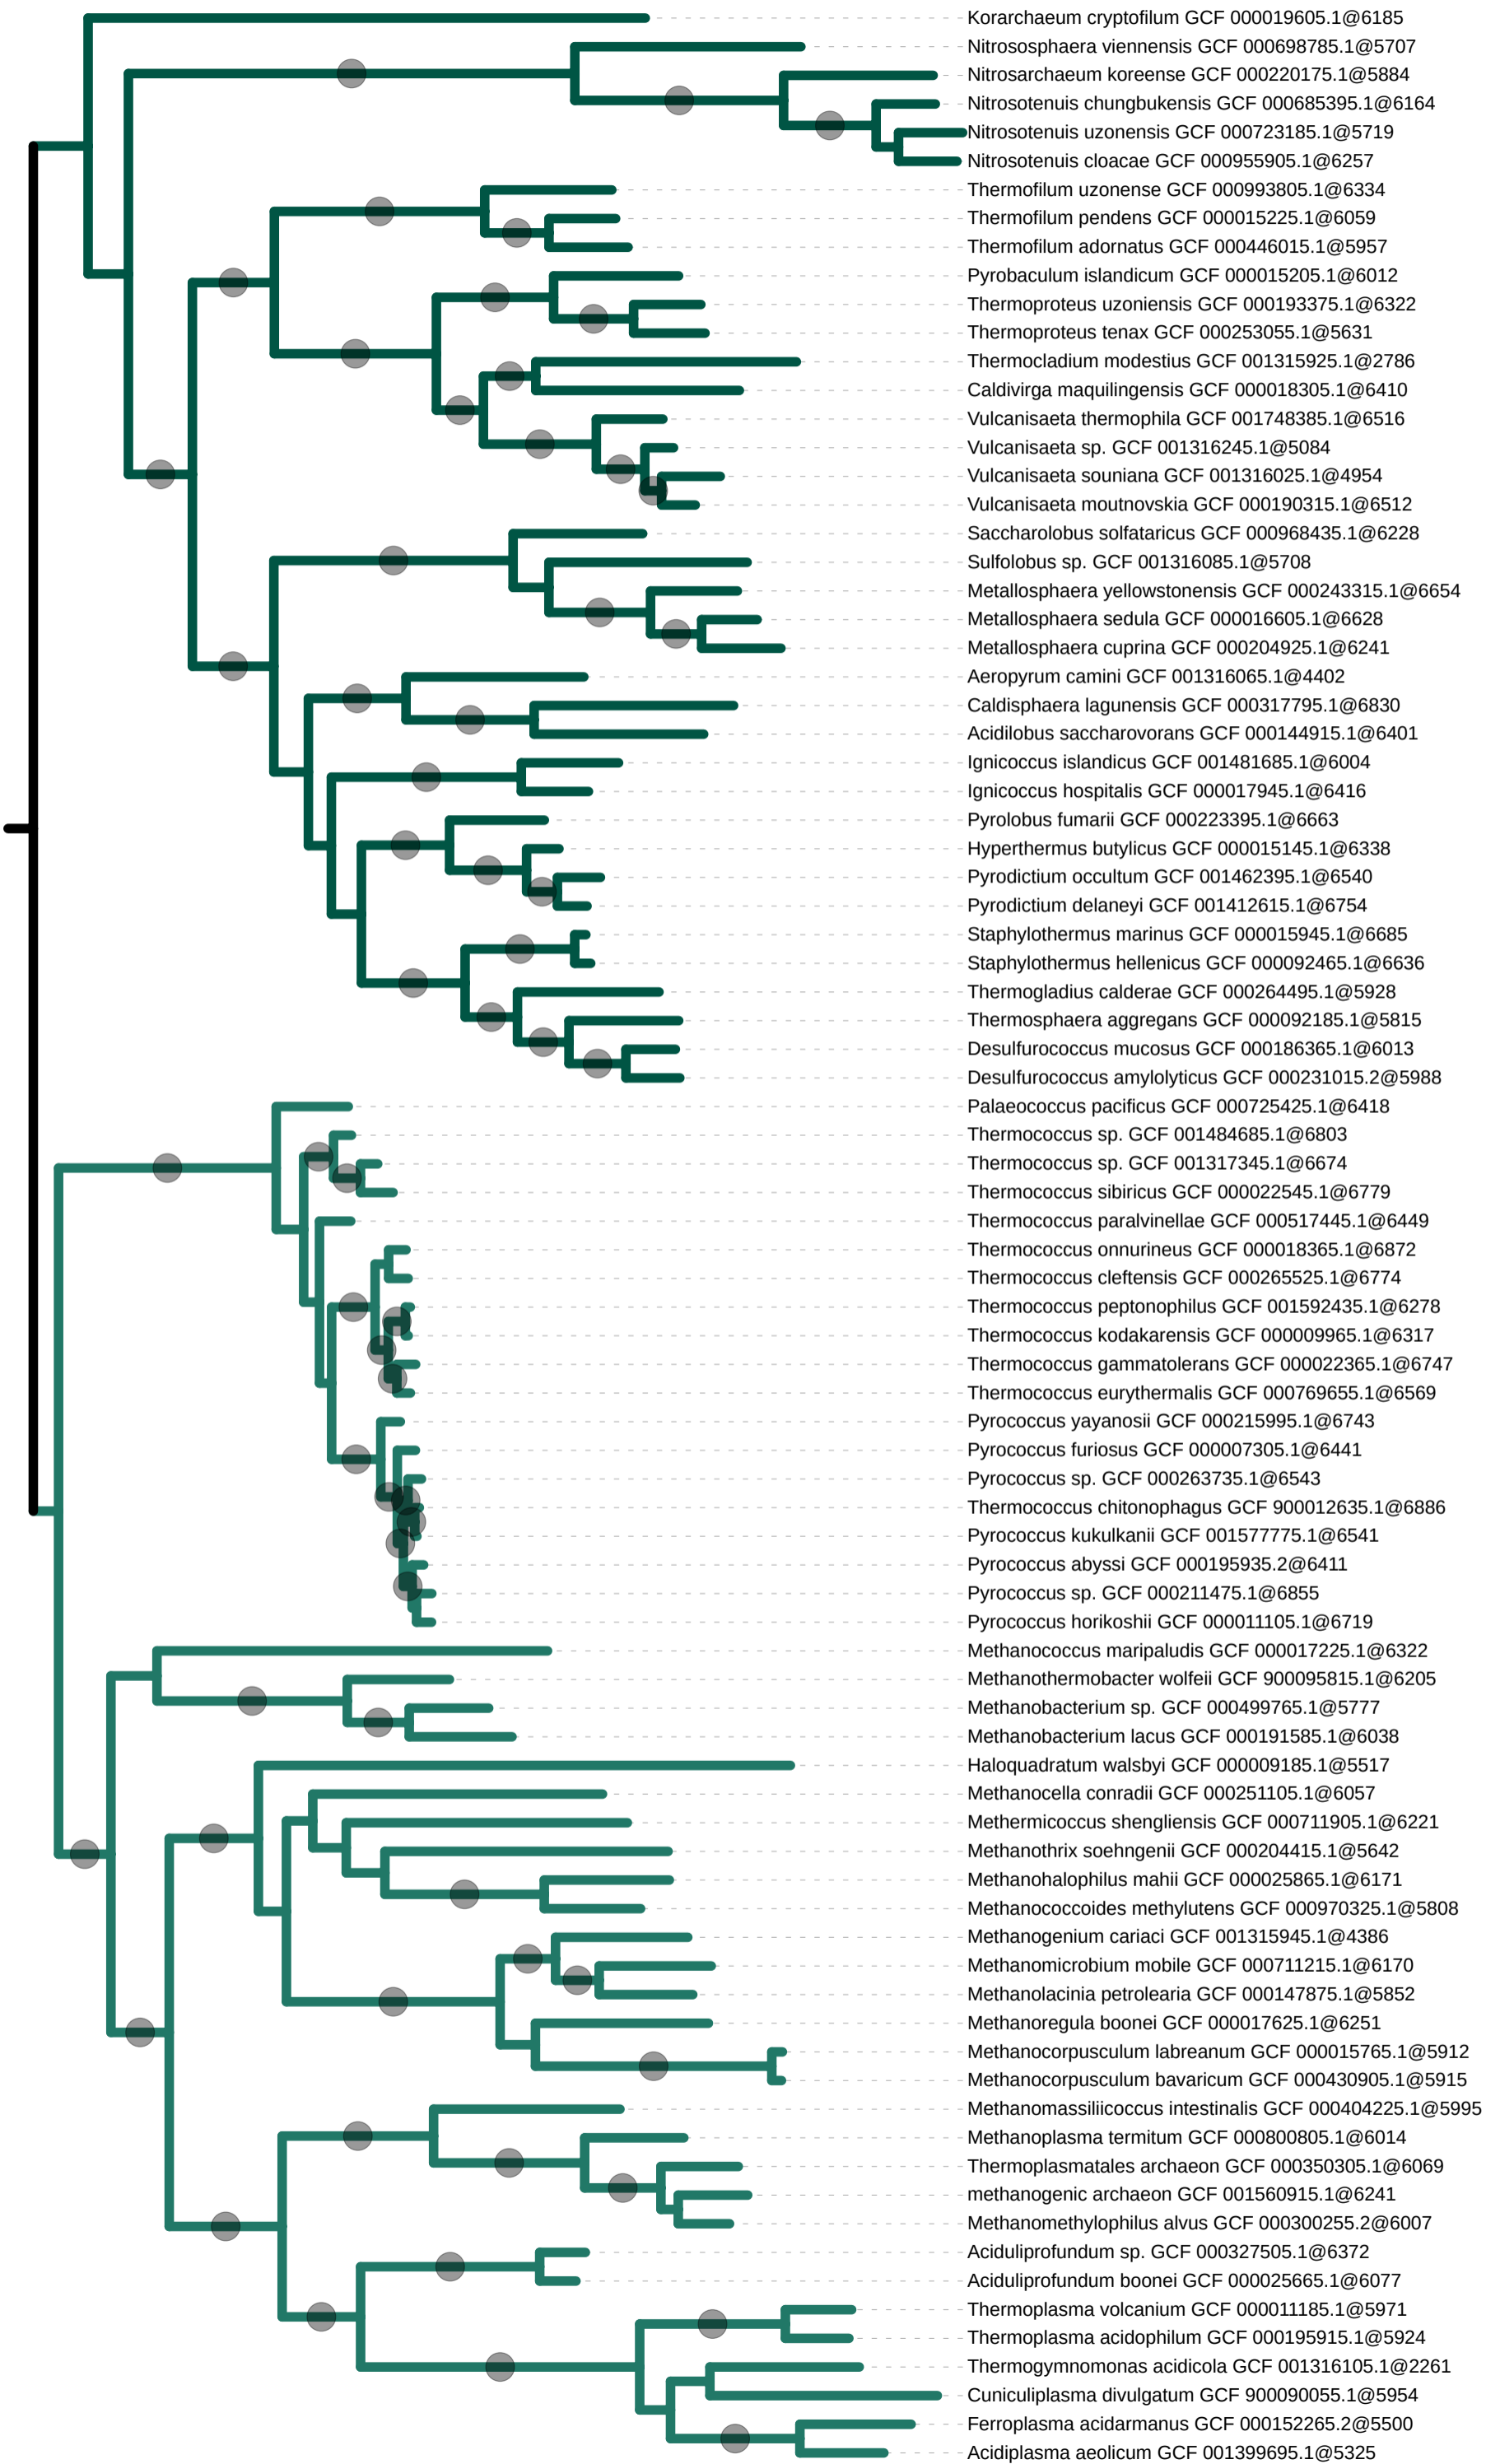

Korarchaeum cryptofilum GCF 000019605.1@6185  
Nitrososphaera viennensis GCF 000698785.1@5707  
Nitrosarchaeum koreense GCF 000220175.1@5884  
Nitrosotenuis chungbukensis GCF 000685395.1@6164  
Nitrosotenuis uzonensis GCF 000723185.1@5719  
Nitrosotenuis cloacae GCF 000955905.1@6257  
Thermofilum uzonense GCF 000993805.1@6334  
Thermofilum pendens GCF 000015225.1@6059  
Thermofilum adornatus GCF 000446015.1@5957  
Pyrobaculum islandicum GCF 000015205.1@6012  
Thermoproteus uzoniensis GCF 000193375.1@6322  
Thermoproteus tenax GCF 000253055.1@5631  
Thermocladium modestius GCF 001315925.1@2786  
Caldivirga maquilingensis GCF 000018305.1@6410  
Vulcanisaeta thermophila GCF 001748385.1@6516  
Vulcanisaeta sp. GCF 001316245.1@5084  
Vulcanisaeta souniana GCF 001316025.1@4954  
Vulcanisaeta moutnovskia GCF 000190315.1@6512  
Saccharolobus solfataricus GCF 000968435.1@6228  
Sulfolobus sp. GCF 001316085.1@5708  
Metallosphaera yellowstonensis GCF 000243315.1@6654  
Metallosphaera sedula GCF 000016605.1@6628  
Metallosphaera cuprina GCF 000204925.1@6241  
Aeropyrum camini GCF 001316065.1@4402  
Caldisphaera lagunensis GCF 000317795.1@6830  
Acidilobus saccharovorans GCF 000144915.1@6401  
Ignicoccus islandicus GCF 001481685.1@6004  
Ignicoccus hospitalis GCF 000017945.1@6416  
Pyrolobus fumarii GCF 000223395.1@6663  
Hyperthermus butylicus GCF 000015145.1@6338  
Pyrodictium occultum GCF 001462395.1@6540  
Pyrodictium delaneyi GCF 001412615.1@6754  
Staphylothermus marinus GCF 000015945.1@6685  
Staphylothermus hellenicus GCF 000092465.1@6636  
Thermogladus calderae GCF 000264495.1@5928  
Thermosphaera aggregans GCF 000092185.1@5815  
Desulfurococcus mucosus GCF 000186365.1@6013  
Desulfurococcus amyolyticus GCF 000231015.2@5988  
Palaeococcus pacificus GCF 000725425.1@6418  
Thermococcus sp. GCF 001484685.1@6803  
Thermococcus sp. GCF 001317345.1@6674  
Thermococcus sibiricus GCF 000022545.1@6779  
Thermococcus paralvinellae GCF 000517445.1@6449  
Thermococcus onnurineus GCF 000018365.1@6872  
Thermococcus cleftensis GCF 000265525.1@6774  
Thermococcus peptonophilus GCF 001592435.1@6278  
Thermococcus kodakarensis GCF 000009965.1@6317  
Thermococcus gammatolerans GCF 000022365.1@6747  
Thermococcus eurythermalis GCF 000769655.1@6569  
Pyrococcus yayanosii GCF 000215995.1@6743  
Pyrococcus furiosus GCF 000007305.1@6441  
Pyrococcus sp. GCF 000263735.1@6543  
Thermococcus chitonophagus GCF 900012635.1@6886  
Pyrococcus kukulkanii GCF 001577775.1@6541  
Pyrococcus abyssi GCF 000195935.2@6411  
Pyrococcus sp. GCF 000211475.1@6855  
Pyrococcus horikoshii GCF 000011105.1@6719  
Methanococcus maripaludis GCF 000017225.1@6322  
Methanothermobacter wolfeii GCF 900095815.1@6205  
Methanobacterium sp. GCF 000499765.1@5777  
Methanobacterium lacus GCF 000191585.1@6038  
Haloquadratum walsbyi GCF 000009185.1@5517  
Methanocella conradii GCF 000251105.1@6057  
Methermicoccus shengliensis GCF 000711905.1@6221  
Methanotherx soehngeni GCF 000204415.1@5642  
Methanohalophilus mahii GCF 000025865.1@6171  
Methanococcoides methylutens GCF 000970325.1@5808  
Methanogenium cariaci GCF 001315945.1@4386  
Methanomicrobium mobile GCF 000711215.1@6170  
Methanolacinia petrolearia GCF 000147875.1@5852  
Methanoregula boonei GCF 000017625.1@6251  
Methanocorpusculum labreanum GCF 000015765.1@5912  
Methanocorpusculum bavaricum GCF 000430905.1@5915  
Methanomassiliicoccus intestinalis GCF 000404225.1@5995  
Methanoplasma termitum GCF 000800805.1@6014  
Thermoplasmatales archaeon GCF 000350305.1@6069  
methanogenic archaeon GCF 001560915.1@6241  
Methanomethylphilus alvus GCF 000300255.2@6007  
Aciduliprofundum sp. GCF 000327505.1@6372  
Aciduliprofundum boonei GCF 000025665.1@6077  
Thermoplasma volcanium GCF 000011185.1@5971  
Thermoplasma acidophilum GCF 000195915.1@5924  
Thermogymnomonas acidicola GCF 001316105.1@2261  
Cuniculiplasma divulgatum GCF 900090055.1@5954  
Ferroplasma acidarmanus GCF 000152265.2@5500  
Acidiplasma aeolicum GCF 001399695.1@5325

Thaumarchaeota

Thermoproteales

Sulfolobales

Acidilobales

Desulfurococcales

Thermococci

Methanomada  
Group

Stenosarchaea  
Group

Diaforarchaea  
Group

TACK Group

Euryarchaeota
