# Supplementary material for: ToRQuEMaDA: tool for retrieving queried Eubacteria, metadata and dereplicating assemblies
Source: PubMed Central journal article supplement (PMC8106394; doi:10.7717/peerj.11348), 2021-05-05

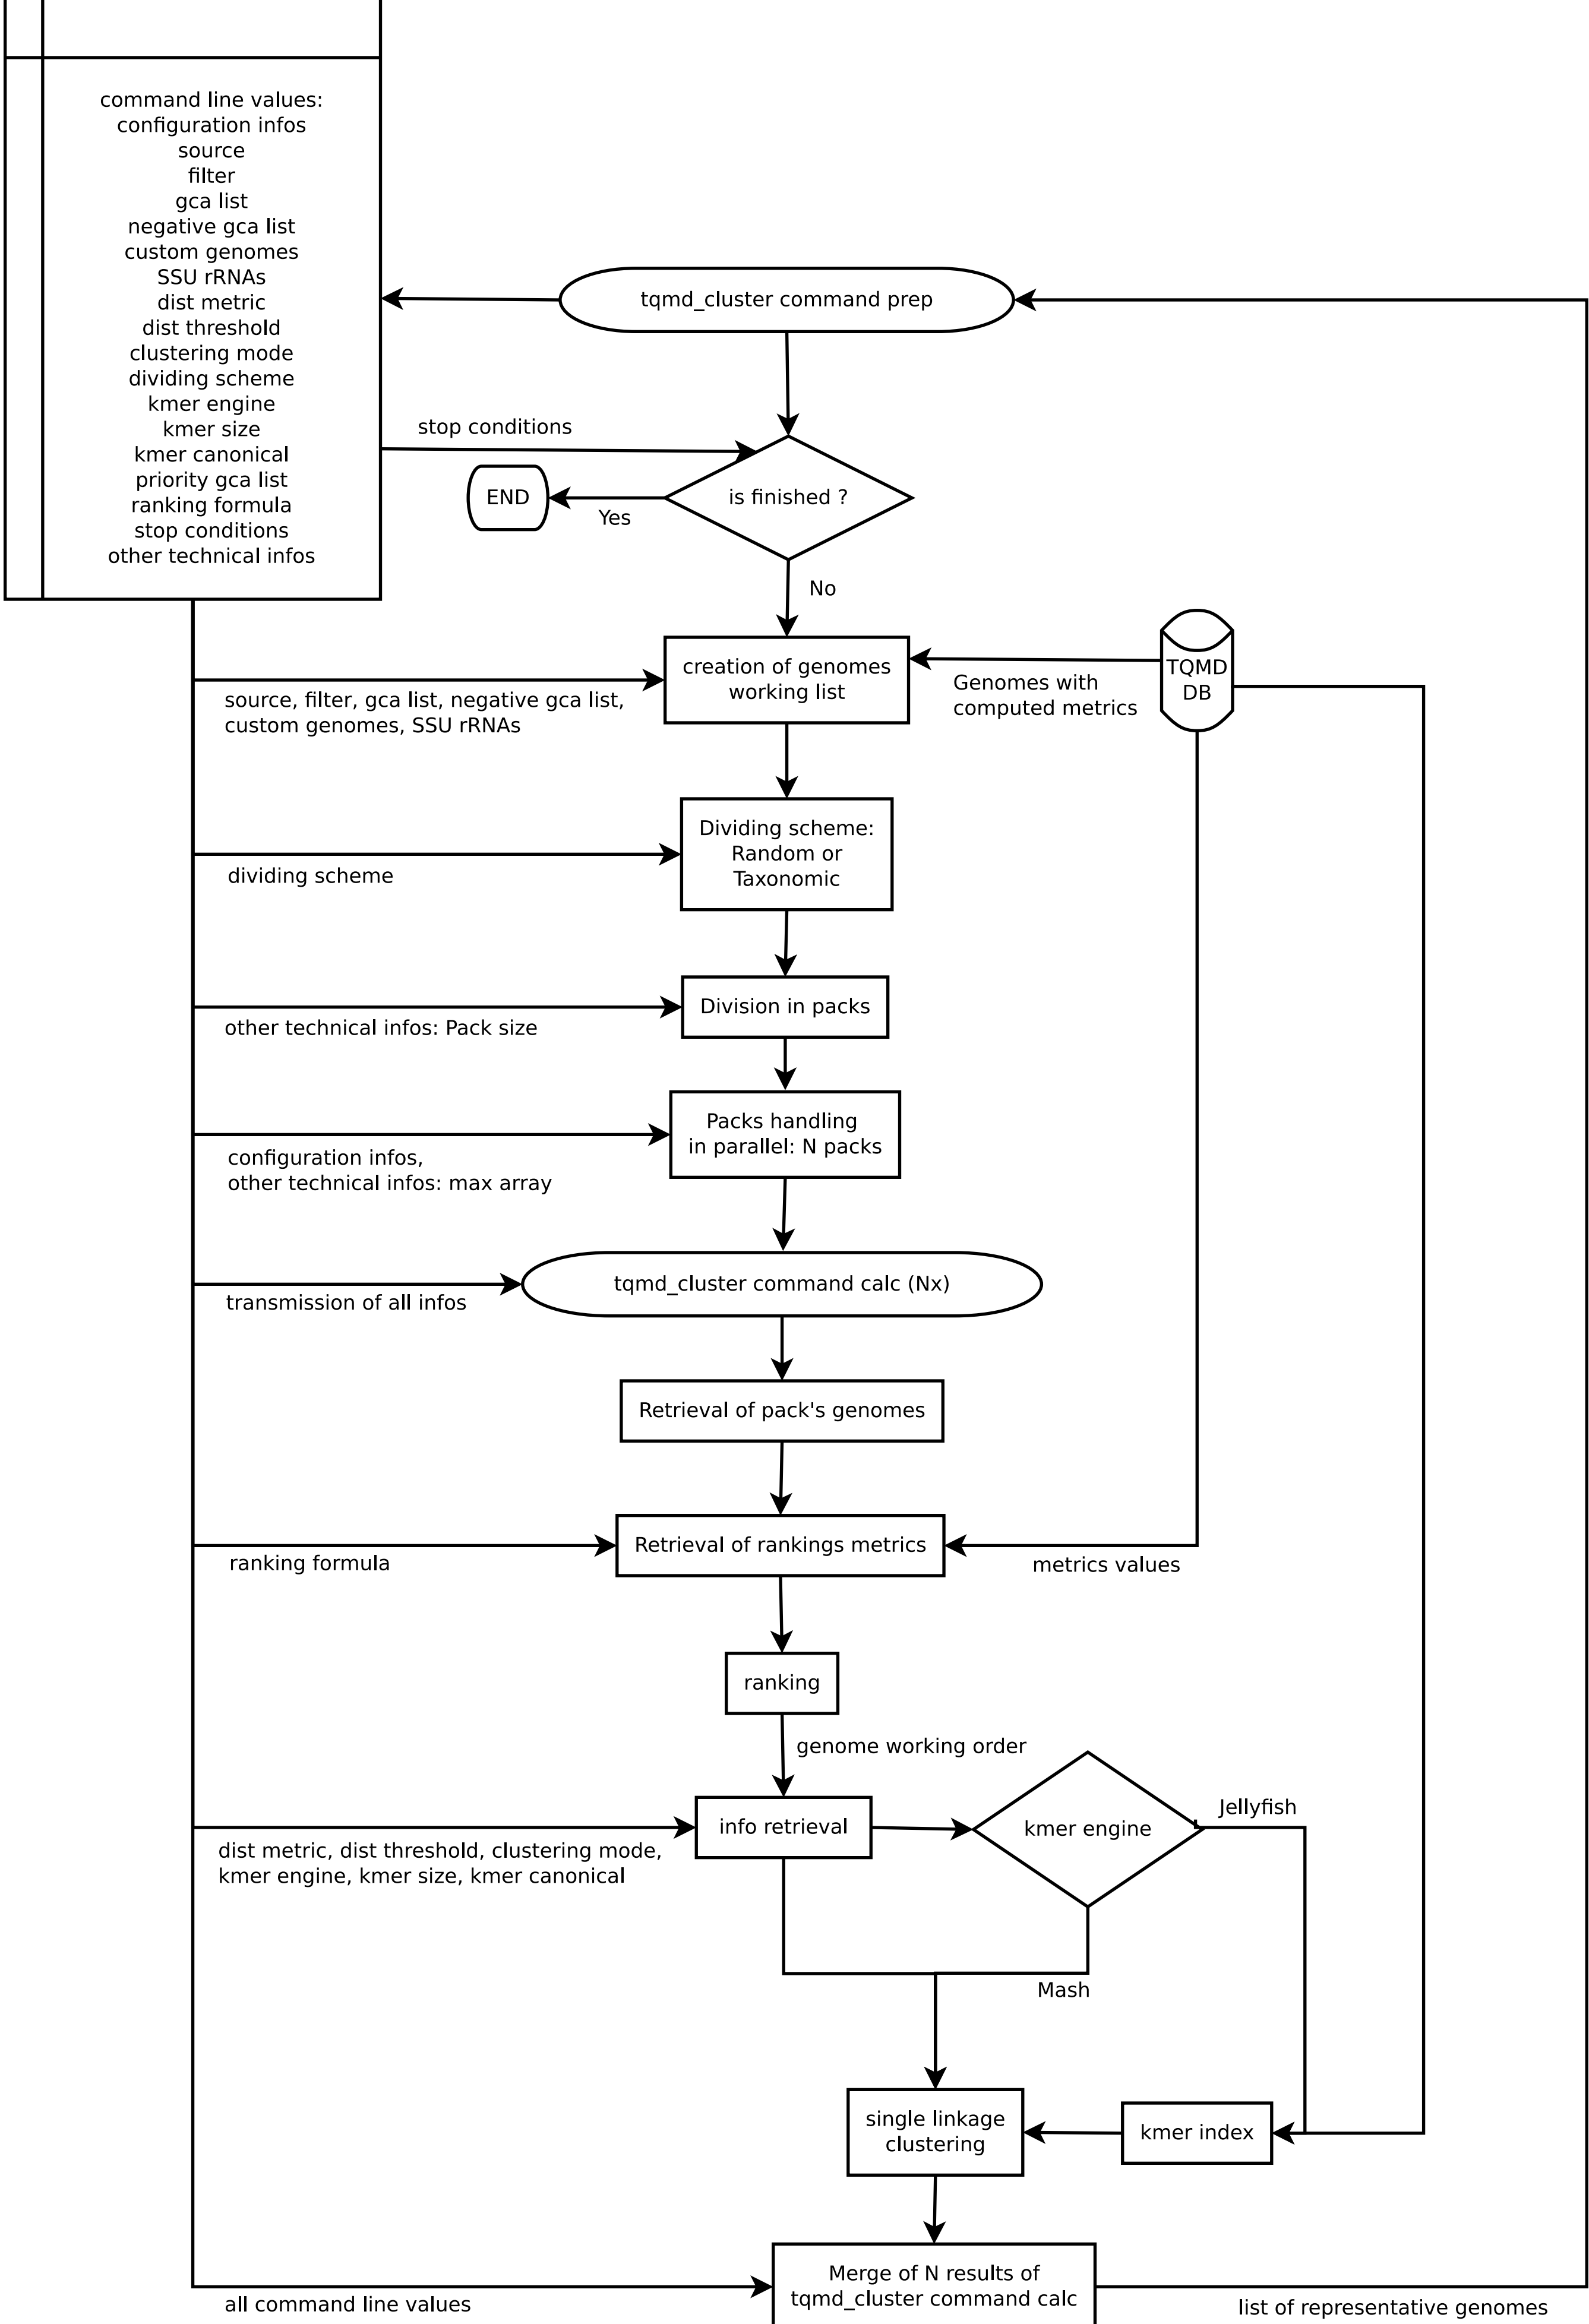

Supplement: peerj-09-11348-s010.pdf [file peerj-09-11348-s010.pdf]
