# Supplementary material for: ToRQuEMaDA: tool for retrieving queried Eubacteria, metadata and dereplicating assemblies
Source: PeerJ journal article supplement (doi:10.7717/peerj.11348), 2021-05-05
Supplement: Supplemental_Figure_S7.pdf [file Supplemental_Figure_S7.pdf]

Tree scale: 0.1

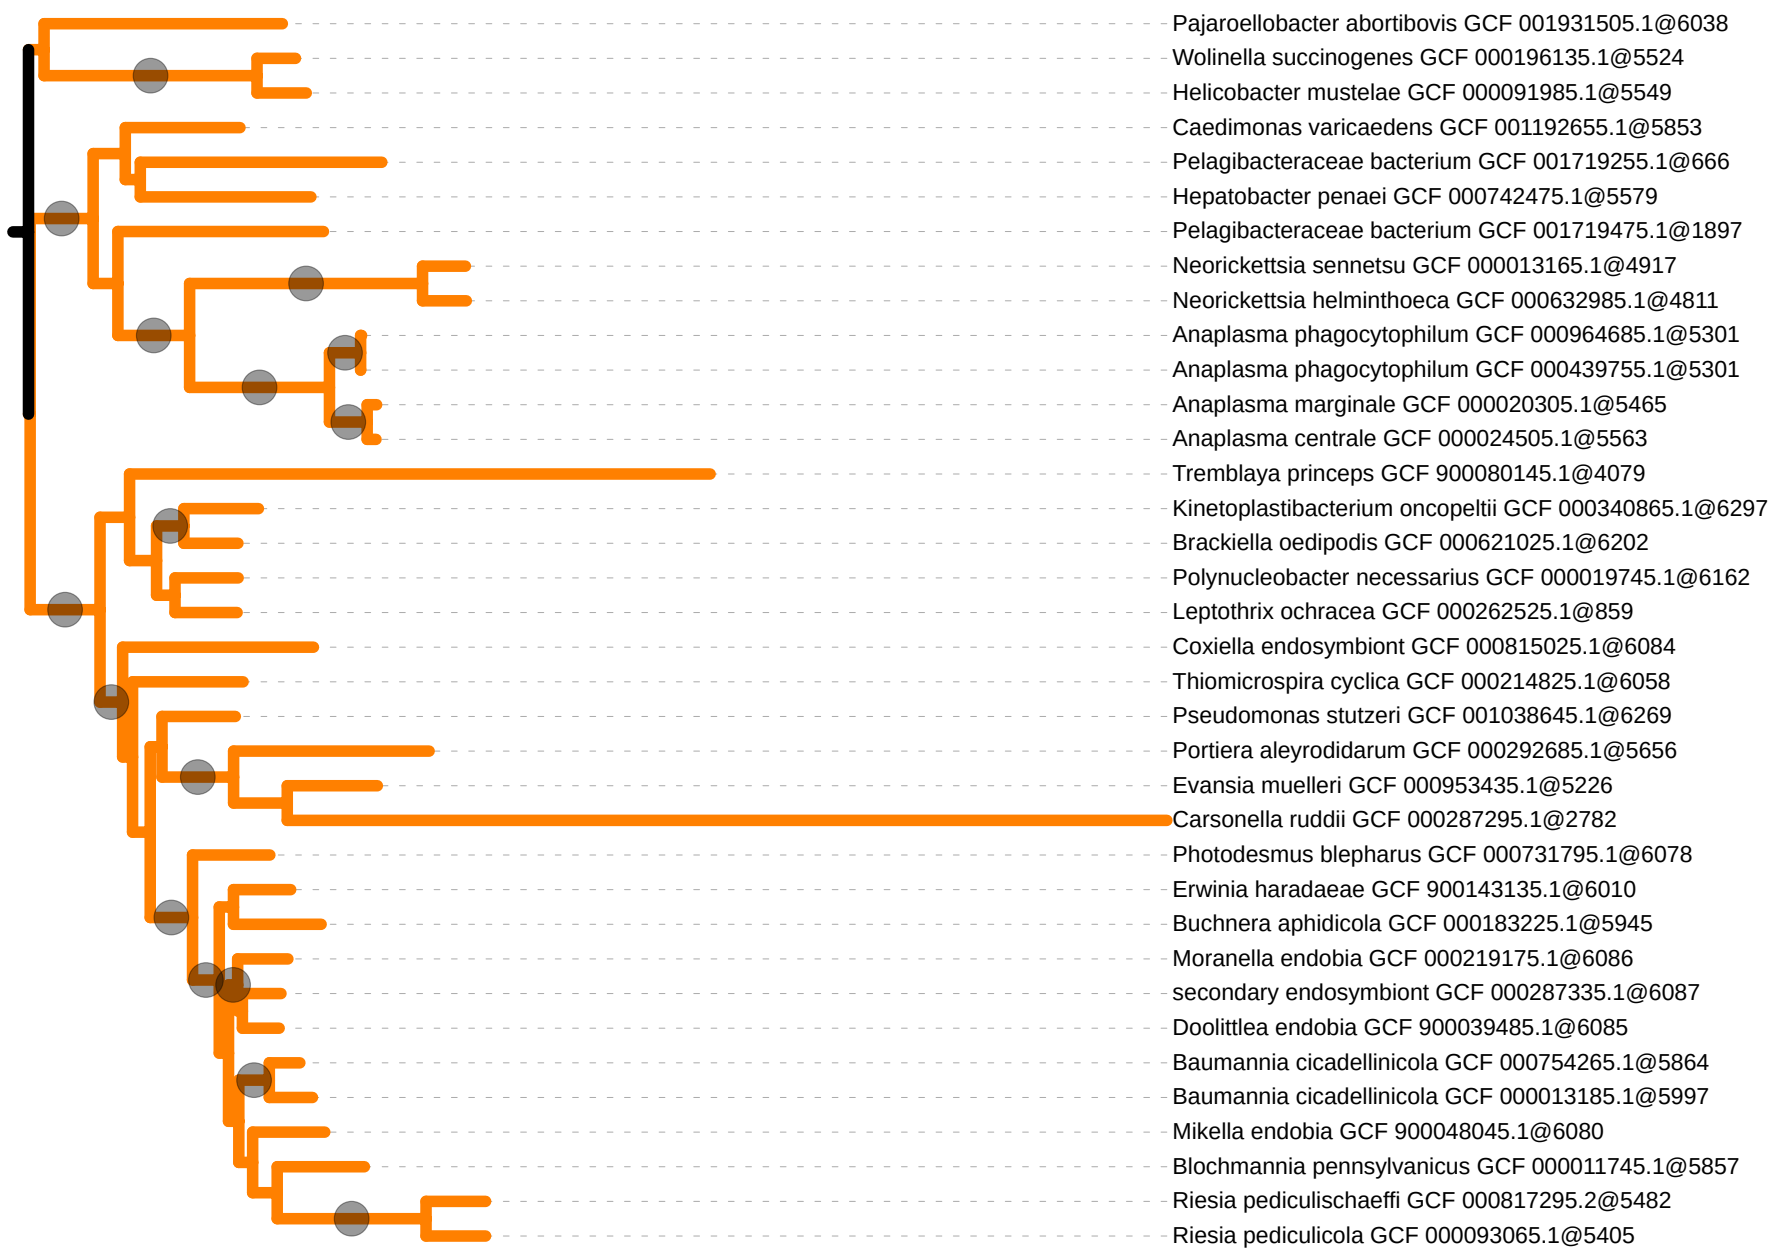

Epsilonproteobacteria

Alphaproteobacteria

Betaproteobacteria

Gammaproteobacteria
