# Supplementary material for: ToRQuEMaDA: tool for retrieving queried Eubacteria, metadata and dereplicating assemblies
Source: PeerJ journal article supplement (doi:10.7717/peerj.11348), 2021-05-05

### Jl threshold estimation

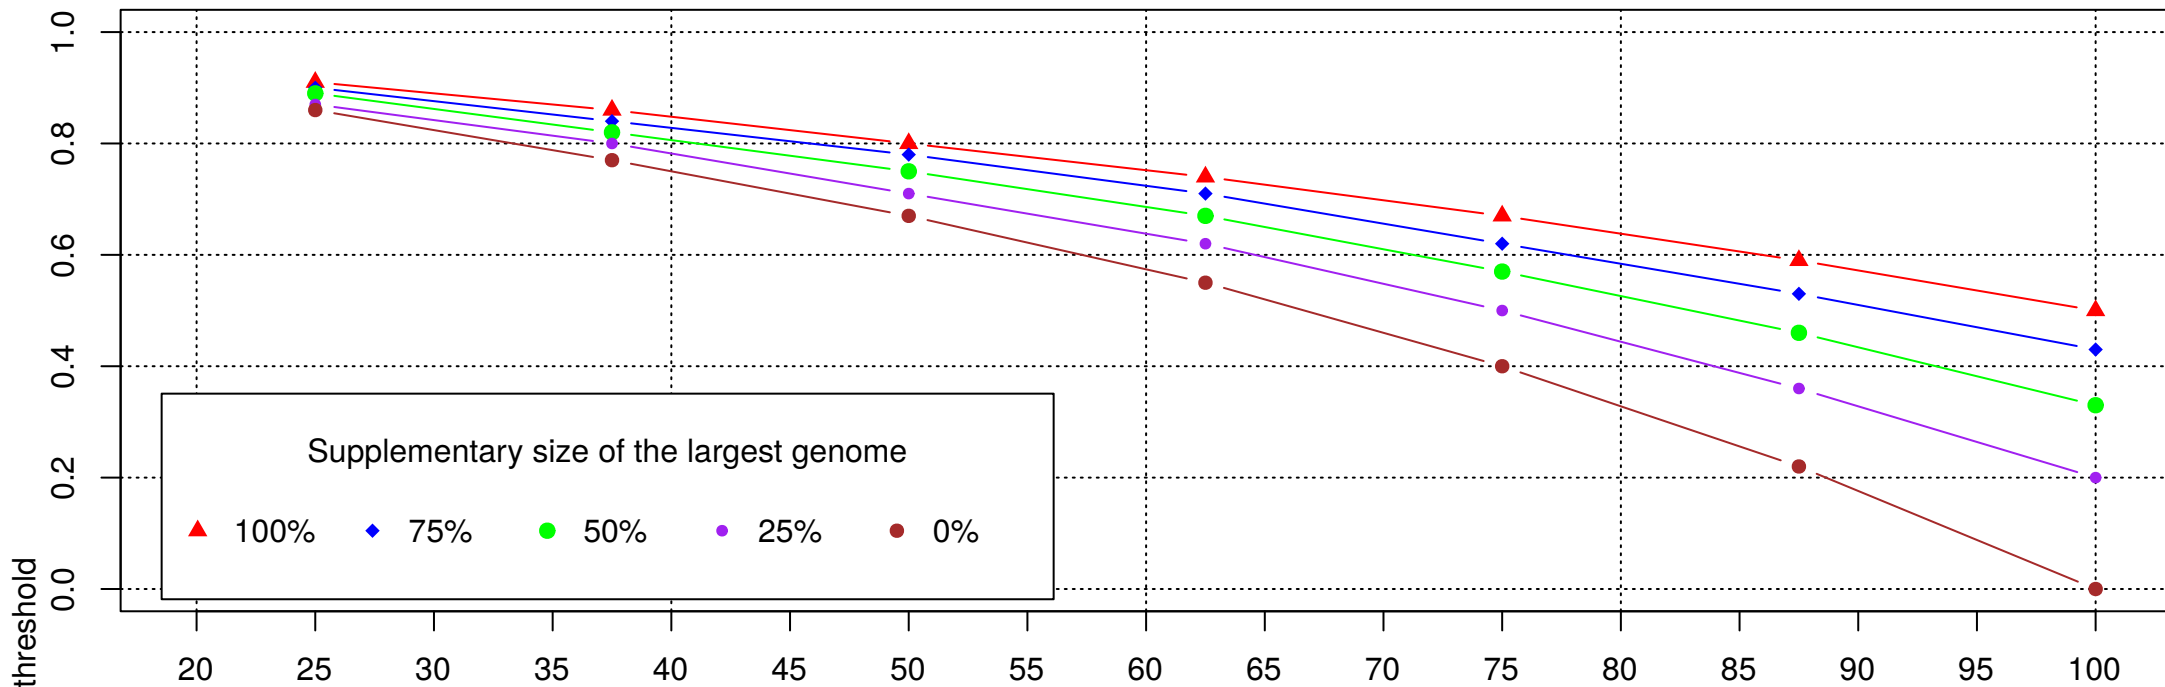

### IGF threshold estimation

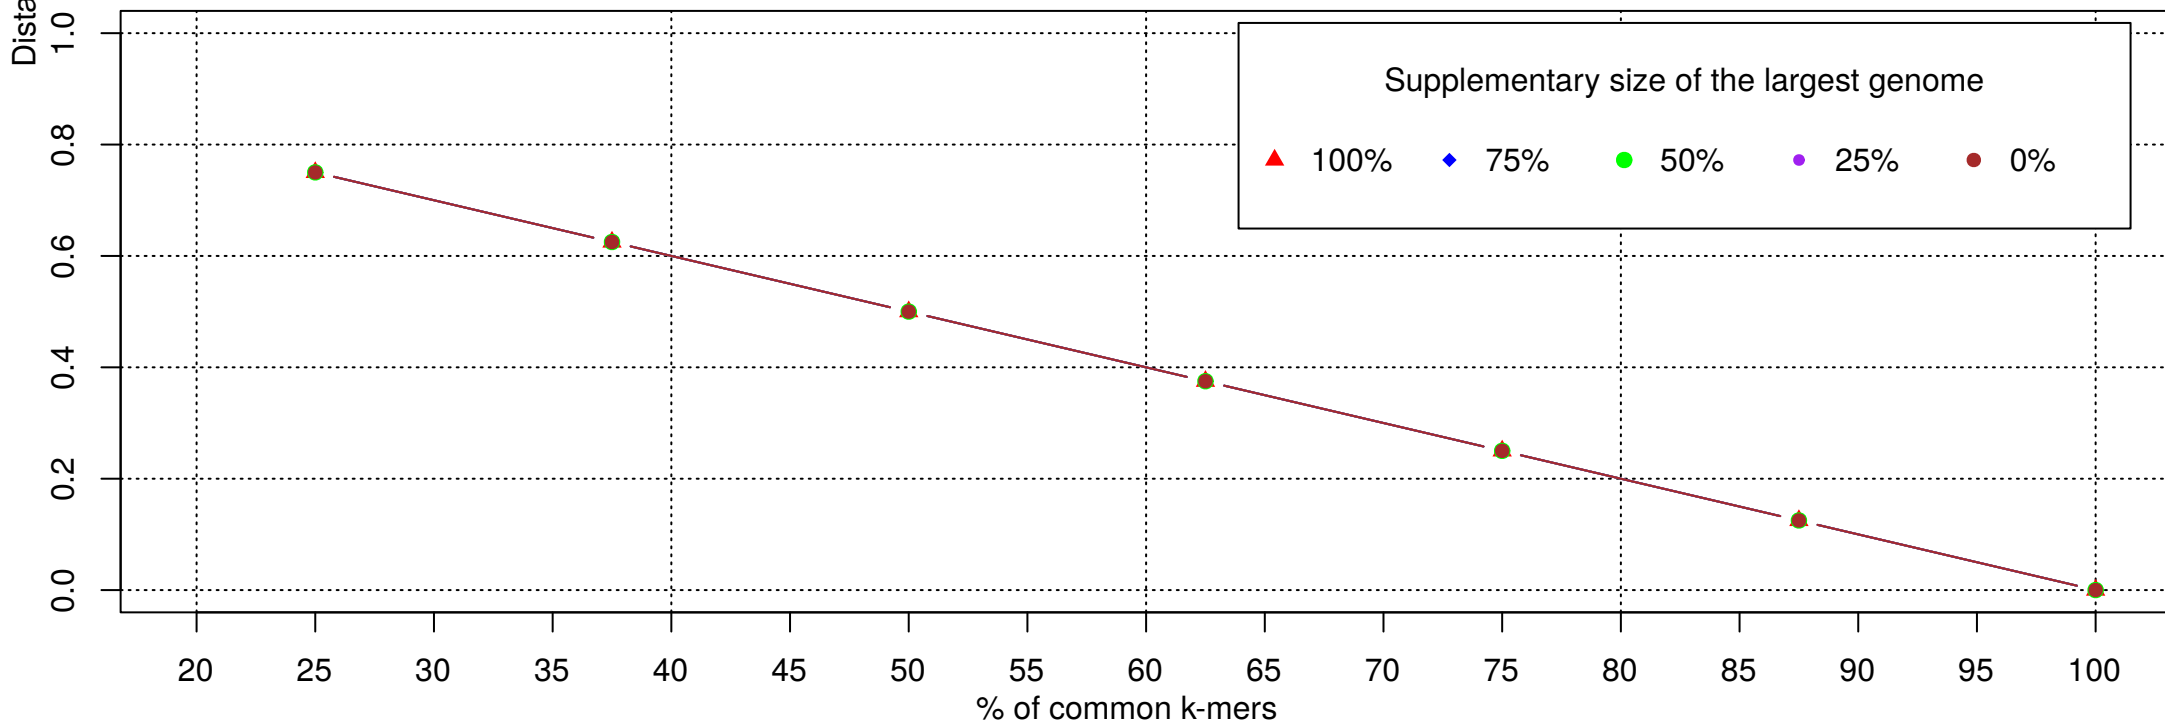

Supplement: Supplemental_Figure_S9.pdf [file Supplemental_Figure_S9.pdf]
